# Supplementary material for: A Novel Allele Encoding 7-Hydroxymethyl Chlorophyll a Reductase Confers Bacterial Blight Resistance in Rice
Source: MDPI journal article supplement (doi:10.3390/ijms22147585), 2021-07-15
Supplement: s1 [file s1]

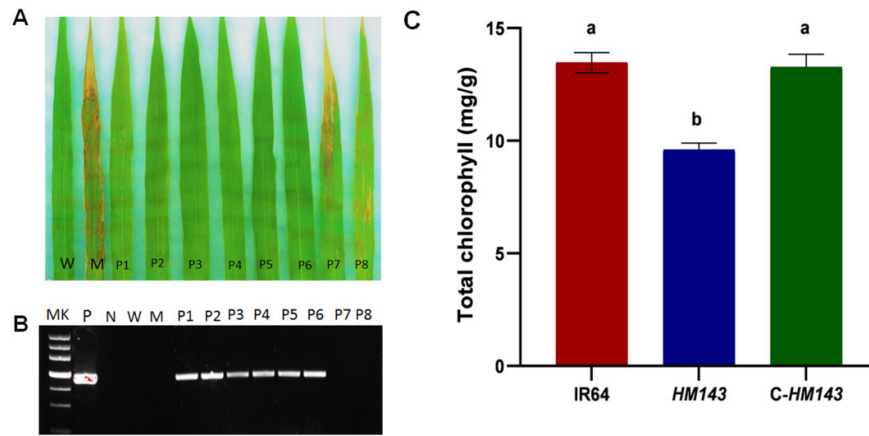

**Figure S1. Validation of *HM143* by complementation.** (A) Leaves of wild type(W), mutant(M), and different complemented plants (P1-P8), (B) Positive transformants were identified by detecting the presence of hygromycin marker gene. MK (Marker), P (Positive control), N (No template DNA), W (Wild type), M (Mutant), P1-P8 (different complemented plants). (C) Total chlorophyll content in IR64, *HM143* and C-HM143. Different letters indicate significant differences according to One-way ANOVA and Duncan's test ( $P \leq 0.05$ ).

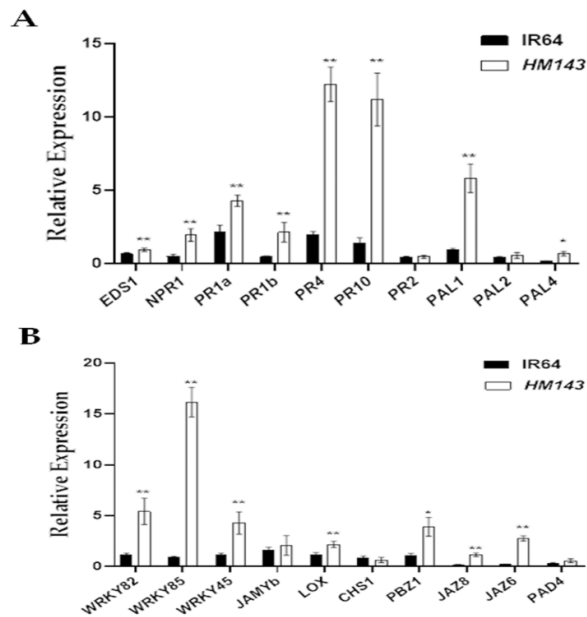

**Figure S2. Expression of defense genes involved in SA and JA signaling pathway. (A)** Expression analysis of SA signaling pathway genes. **(B)** Expression analysis of JA signaling pathway genes. Values are means  $\pm$  SD of three biological replicates; \*\* indicates significance at  $P \leq 0.01$  and \* indicates significance at  $P \leq 0.05$  by Student's t test.

**Table S1.** List of primers used for this study

| Primer          | Primer sequence (5'-3')     | Purpose      |
|-----------------|-----------------------------|--------------|
| 143gRNA         | AGATCCAAGGCCATCCCTCC        | CRISPR/Cas9  |
| 123-126-4-F     | CACTGGACACGTCTGCAACA        | Fine mapping |
| 123-126-4-R     | ACGCCTGCACCATCTTGGCCA       |              |
| 127-130-1-F     | GACGCTTAATTGTCAGCACA        |              |
| 127-130-1-R     | TTATGAACAGCTCCTGCCA         |              |
| 123-126-8-F     | GCATTATAGGATGTCCATG         |              |
| 123-126-8-R     | TAAACAGAGTATGCCAATCC        |              |
| 126-1-F         | ATGTTCTTAATATTTTCTTCC       |              |
| 126-1-R         | CCATGGGACTTGGGAGGTAT        |              |
| RM16686-F       | GGCACTGCTTGCATATGGATCG      |              |
| RM16686-R       | TGCCGCGAACTTATCCTCTCC       |              |
| RM16682-F       | TGTATTTGCGTGGTGATTGG        | PR genes     |
| RM16682-R       | TTAGGCAGGTACACAATGATGC      |              |
| <i>EDS1-F</i>   | CATTCCAAGAACGAGGACACTG      |              |
| <i>EDS1-R</i>   | CAAGACTCAAGGCTAGAACCGA      |              |
| <i>NPRI-F</i>   | GGCAGGTGAGAGTCTACGAGGAA     |              |
| <i>NPRI-R</i>   | GCTGTCATCCGAGCTAAGTGTT      |              |
| <i>PR1b-F</i>   | AGAACTACGCCAGCCAGAGAAG      |              |
| <i>PR1b-R</i>   | TTCTCGCCAAGGTTGTTCCG        |              |
| <i>PR10-F</i>   | CACCATCTACACCATGAAGC        |              |
| <i>PR10-R</i>   | AGCACATCCGACTTTAGGAC        |              |
| <i>PAL2-R</i>   | GCATCAGCTTCCAACCTCG         |              |
| <i>PAL2-R</i>   | GGTTTCGCACTCCATTACAGA       |              |
| <i>PR1a-F</i>   | GGAAGTACGGCGAGAACATC        |              |
| <i>PR1a-R</i>   | TGGTCGATCCACTGCTTCTC        |              |
| <i>PR4-F</i>    | AGTATGGATGGACCGCCTTCTGT     |              |
| <i>PR4-R</i>    | CTCGCAATTATTGTCGCACCTGTTT   |              |
| <i>PR2-F</i>    | GGCAGGTGAGAGTCTACGAGGAA     |              |
| <i>PR2-R</i>    | GCTGTCATCCGAGCTAAGTGTT      |              |
| <i>PAL4-F</i>   | CTTCACAACAGCTAATCGAG        |              |
| <i>PAL4-R</i>   | CGCACTCCATTTCAGTACCA        |              |
| <i>WRKY82-F</i> | AGTGAAAAGTAGTGAAAATTCCAG    |              |
| <i>WRKY82-R</i> | GTGCTAGTTTCAATTATTCTGCTTCGT |              |
| <i>WRKY85-F</i> | CAGCAAGAAAAGGAATATACAAAT    |              |
| <i>WRKY85-R</i> | CTCAATGTGTTTCCTAACATTACA    |              |
| <i>WRKY45-F</i> | TTCCTTGTTGATGTGTCGTCTCA     |              |
| <i>WRKY45-R</i> | CCCCCAGCTCATAATCAAGAAC      |              |
| <i>JAMYb-F</i>  | CCGAGCATGGTGACTAGCTCATCTT   |              |
| <i>JAMYb-R</i>  | CCTTGCACCCAACCGTTAAGCTGTT   |              |
| <i>LOX-F</i>    | GATGGCGGTGCTCGACGTGCT       |              |
| <i>LOX-R</i>    | GCACCTGTTCTTGAGCTTTCTAT     |              |
| <i>PBZ1-F</i>   | CCCTGCCGAATACGCCTAA         |              |

|                |                                            |                     |
|----------------|--------------------------------------------|---------------------|
| <i>PBZ1-R</i>  | CTCAAACGCCACGAGAAATTTG                     |                     |
| <i>CHS1-F</i>  | GACTACCCGGACTACTACTTCA                     |                     |
| <i>CHS1-R</i>  | CTTCCTGATCGCGACTTG                         |                     |
| <i>JAZ8-F</i>  | CCAAACACGGCGGAAACAG                        |                     |
| <i>JAZ8-R</i>  | GGTGGACGGGAAGTTCTCAAAG                     |                     |
| <i>JAZ6-F</i>  | GGACATGCCGATCGCGAGGAA                      |                     |
| <i>JAZ6-R</i>  | GCGCGAGTGCATGTGTCCA                        |                     |
| <i>PAD4-F</i>  | CCAACATGTACCGCATCAAG                       |                     |
| <i>PAD4-R</i>  | GGTTGTTTCGGTGGTAGTGGC                      |                     |
| <hr/>          |                                            |                     |
| <i>OsMC1-F</i> | GCTTCATCAAGGCGGTGGAGT                      |                     |
| <i>OsMC1-R</i> | AAGTTGGCGACCTTGCGGATG                      |                     |
| <i>OsMC2-F</i> | CGACCCGTACAGGGTGCCGA                       |                     |
| <i>OsMC2-R</i> | GCACAGCGCCTCGTCGTAGC                       |                     |
| <i>OsMC3-F</i> | GGCTCCTTCGTCCGAAGAT                        |                     |
| <i>OsMC3-R</i> | CACAGGAGAAACGGTTTCCTGT                     | PCD-related         |
| <i>OsMC4-F</i> | TCGACGTTTCGTGGAGATGCTC                     | genes               |
| <i>OsMC4-R</i> | ATTCACGAGCCGCCTGATCTT                      |                     |
| <i>OsMC5-F</i> | GTGCCAGACCGACCAGACAT                       |                     |
| <i>OsMC5-R</i> | CCGCTCTTCTCCGACAGGAT                       |                     |
| <i>OsMC6-F</i> | CCACACCGCAGGGTTCTTCAT                      |                     |
| <i>OsMC6-R</i> | GTCCAGGCTGCTGAGTGATATCC                    |                     |
| <i>OsMC7-F</i> | ATACAGACCGTGCTGGCGTC                       |                     |
| <i>OsMC7-R</i> | AGGAATGGCGTCTCGGCGTT                       |                     |
| <i>OsMC8-F</i> | TCCGGCAAGTGCCTCGTAAC                       |                     |
| <i>OsMC8-R</i> | AGATAACAACGGAAGCATAAAGTC                   |                     |
| <hr/>          |                                            |                     |
| <i>RbcL-F</i>  | ATCGTGCTCGCGGTATCTTT                       |                     |
| <i>RbcL-R</i>  | ACCAGGTGCATTACCCCAAG                       |                     |
| <i>CHLD-F</i>  | GGAAAGAGAGGGCATTAG                         |                     |
| <i>CHLD-R</i>  | CAATACGATCAAGTAAGTGTT                      |                     |
| <i>cab2R-F</i> | GTTCTCCATGTTTCGGCTTCT                      |                     |
| <i>cab2R-R</i> | GACGAAGTTGGTGGCGTAG                        |                     |
| <i>CHLH-F</i>  | TGACTCAGACCCGACAAAGC                       | Photosynthesis-rela |
| <i>CHLH-R</i>  | TCCCCTCGTACCACTTAGGG                       | ted genes           |
| <i>CHLI-F</i>  | CGGAGTAACCTTGGTGCTGT                       |                     |
| <i>CHLI-R</i>  | CTTGGCAGCCCTGTTAGTCA                       |                     |
| <i>HEMA1-F</i> | ACACGCCATCTGTTTGAGGT                       |                     |
| <i>HEMA1-R</i> | CAAGCCTCCACTGTTTGGC                        |                     |
| <i>PsbA-F</i>  | TGTAGCTGGTGATTTCGGCG                       |                     |
| <i>PsbA-R</i>  | ATAACCATGAGCGGCCACAA                       |                     |
| <i>PorA-F</i>  | ATCACCAAGGGCTACGTCTC                       |                     |
| <i>PorA-R</i>  | GAGTTGTTGTTCCAGCTCCA                       |                     |
| <i>RbcS-F</i>  | CCGTGAGAACCACAGATCCC                       |                     |
| <i>RbcS-R</i>  | ACGTTGTCTGAAGCCGATGAT                      |                     |
| <hr/>          |                                            |                     |
| 134CDS-1       | AGCGTGGGTCTCGGGCTCCATGGCGCGGTGCATCTCCTTCCT | CDS sequence        |

|                |                                                |                   |
|----------------|------------------------------------------------|-------------------|
| 143CDS-2       | AGCGTGGGTCTCGCTGACTGGAGCATCGACTCGATGCGTCCGTCCT | amplification     |
| 143-5          | GATCACGGTCTCGACCTCCTTGTGTTTCGATAC              | Promoter sequence |
| 143-6          | GCGATAGGTCTCGTGTTTGCACAGTGACCG                 | amplification     |
| <i>UBI-F</i>   | CCCTCCACCTCGTCCTCAG                            | Reference gene    |
| <i>UBI-R</i>   | AGATAACAACGGAAGCATAAAAGTC                      |                   |
| <i>RCCR1-F</i> | CGCATTCCTCATGGAATTT                            |                   |
| <i>RCCR1-R</i> | CTTCTCACGCTGTTGTCCA                            |                   |
| Osh36-F        | AACGCATTTGTGGTTGGCTC                           |                   |
| Osh36-R        | TCAACTTTGGCCGGTGTCTT                           | Senescence-       |
| Osh57-F        | ACCCTAAAGTAAATGAAGTC                           | Related genes     |
| Osh57-R        | CCTGCTCCTTGTCTTGTAC                            |                   |
| SGR-F          | AGGGGTGGTACAACAAGCTG                           |                   |
| SGR-R          | GCTCCTTGCGGAAGATGTAG                           |                   |

**Table S2.**List of the 20 potential off-target sites

| Sequence                                                   | Score | Locus          | Gene           | Region     |
|------------------------------------------------------------|-------|----------------|----------------|------------|
| ACATCCAAGGCCATCCCTCT <b>AAG</b>                            | 8.6   | Chr7:-15050489 |                | Intergenic |
| AGCTCCA <b>ACT</b> CCATCCCTCC <b>TGG</b>                   | 1.4   | Chr5:-21075196 |                | Intergenic |
| <b>GAT</b> TCCATGGCCATCCCTCC <b>AGG</b>                    | 1.4   | Chr7:+29470914 | LOC_Os07g49210 | CDS        |
| AGCTCCAAG <b>CCC</b> TCCCTCC <b>TAG</b>                    | 1.0   | Chr7:-10977529 |                | Intergenic |
| AGCTCCA <b>GCT</b> CCATCCCTCC <b>TGG</b>                   | 0.8   | Chr4:+35367918 |                | Intergenic |
| AGCTCCA <b>GCT</b> CCATCCCTCC <b>TGG</b>                   | 0.8   | Chr11:-6133406 |                | Intergenic |
| AGCTCCA <b>GCT</b> CCATCCCTCC <b>TGG</b>                   | 0.8   | Chr8:-17654804 |                | Intergenic |
| AGCTCCA <b>GCT</b> CCATCCCTCC <b>TGG</b>                   | 0.8   | Chr11:+5529310 |                | Intergenic |
| AGCTCCA <b>GCT</b> CCATCCCTCC <b>TGG</b>                   | 0.8   | Chr10:-3948507 |                | Intergenic |
| AGCTCCA <b>GCT</b> CCATCCCTCC <b>TAG</b>                   | 0.5   | Chr9:-17888292 |                | Intergenic |
| AGCTCCA <b>CGT</b> CCATCCA <b>ATC</b> <b>GGG</b>           | 0.5   | Chr3:-10215007 | LOC_Os03g18210 | CDS        |
| AGA <b>AT</b> CAAG <b>A</b> CCATCCT <b>T</b> CC <b>TAG</b> | 0.3   | Chr5:+14105545 | LOC_Os05g24410 | CDS        |
| ACATCCA <b>CC</b> GCCATCCCT <b>GC</b> <b>TGG</b>           | 0.1   | Chr8:+9008420  |                | Intergenic |
| AGCTCCA <b>ACT</b> CCA <b>CCC</b> TCC <b>TGG</b>           | 0.1   | Chr1:+6847610  |                | Intergenic |
| AGCTCCA <b>ACT</b> CCA <b>CCC</b> TCC <b>TGG</b>           | 0.1   | Chr8:+11059261 | LOC_Os08g18044 | Intron     |
| AGCTCCA <b>ACT</b> CCA <b>CCC</b> TCC <b>TGG</b>           | 0.1   | Chr5:+19551140 |                | Intergenic |
| AGCTCCA <b>ACT</b> CCA <b>CCC</b> TCC <b>TGG</b>           | 0.1   | Chr11:+3787600 | LOC_Os11g07470 | Intron     |
| AGCTCCA <b>ACT</b> CCA <b>CCC</b> TCC <b>TGG</b>           | 0.1   | Chr3:+26444886 |                | Intergenic |
| AGCTCCA <b>ACT</b> CCA <b>CCC</b> TCC <b>TGG</b>           | 0.1   | Chr4:+24196628 |                | Intergenic |
| AGCTCCA <b>ACT</b> CCA <b>CCC</b> TCC <b>TGG</b>           | 0.1   | Chr12:+6191726 |                | Intergenic |

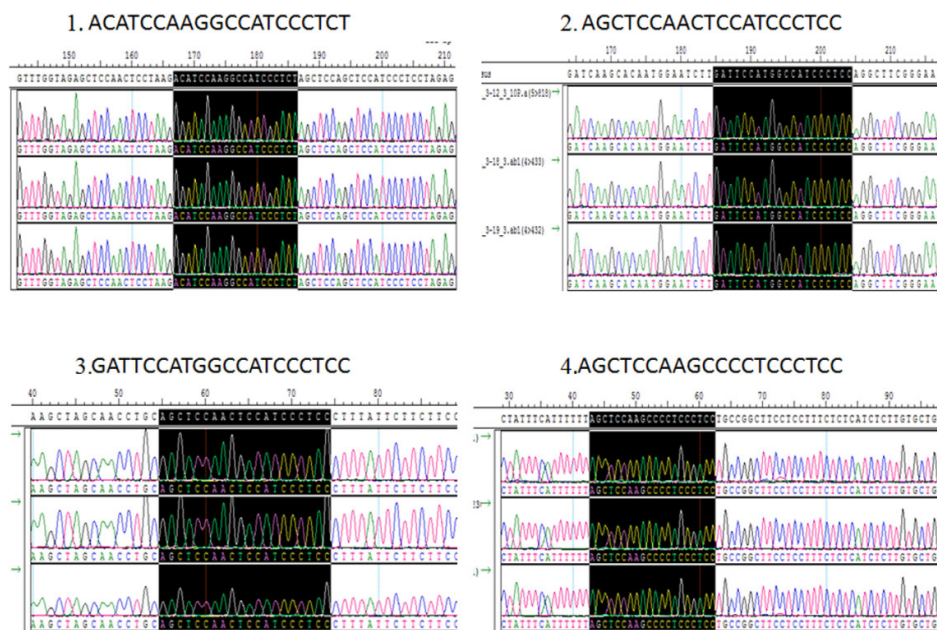

**Figure S3.** Sequence alignments of off-target sites 1, 2, 3, 4 in Cr-12, Cr-18 and Cr-19 respectively.

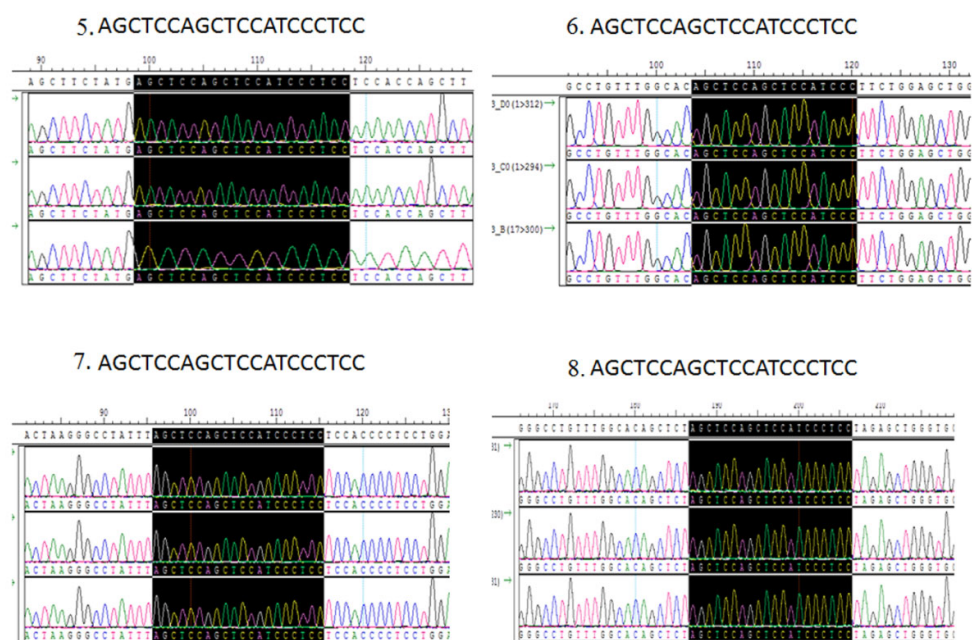

**Figure S4.** Sequence alignments of off -target sites 5, 6, 7, 8 in Cr-12, Cr-18 and Cr-19 respectively.



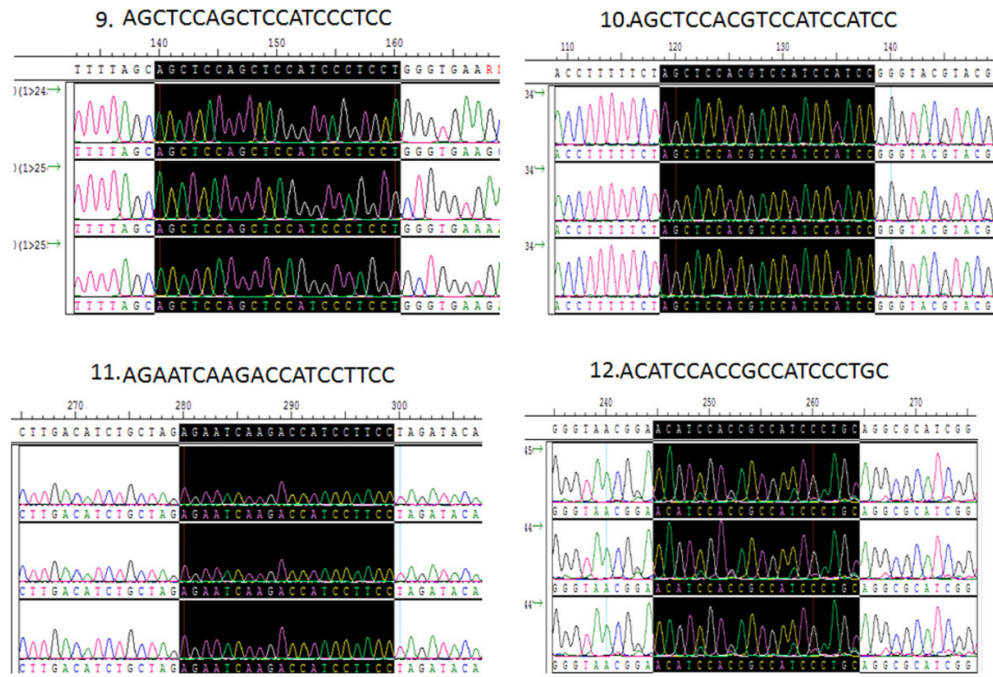

**Figure S5.** Sequence alignments of off -target sites 9, 10, 11, 12 in Cr-12, Cr-18 and Cr-19 respectively.

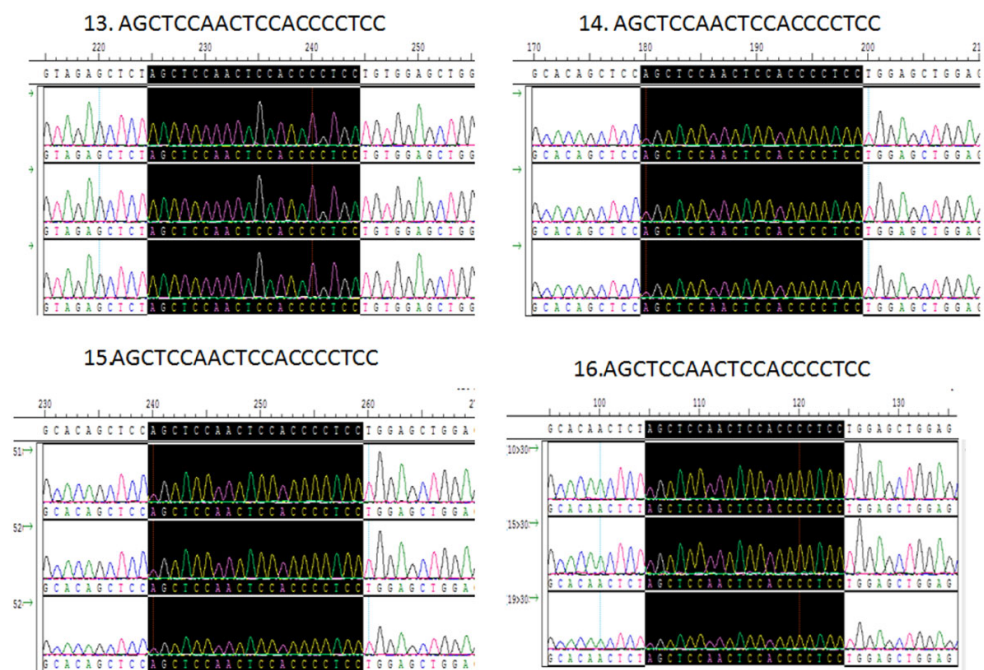

**Figure S6.** Sequence alignments of off -target sites 13, 14, 15, 16 in Cr-12, Cr-18 and Cr-19 respectively.

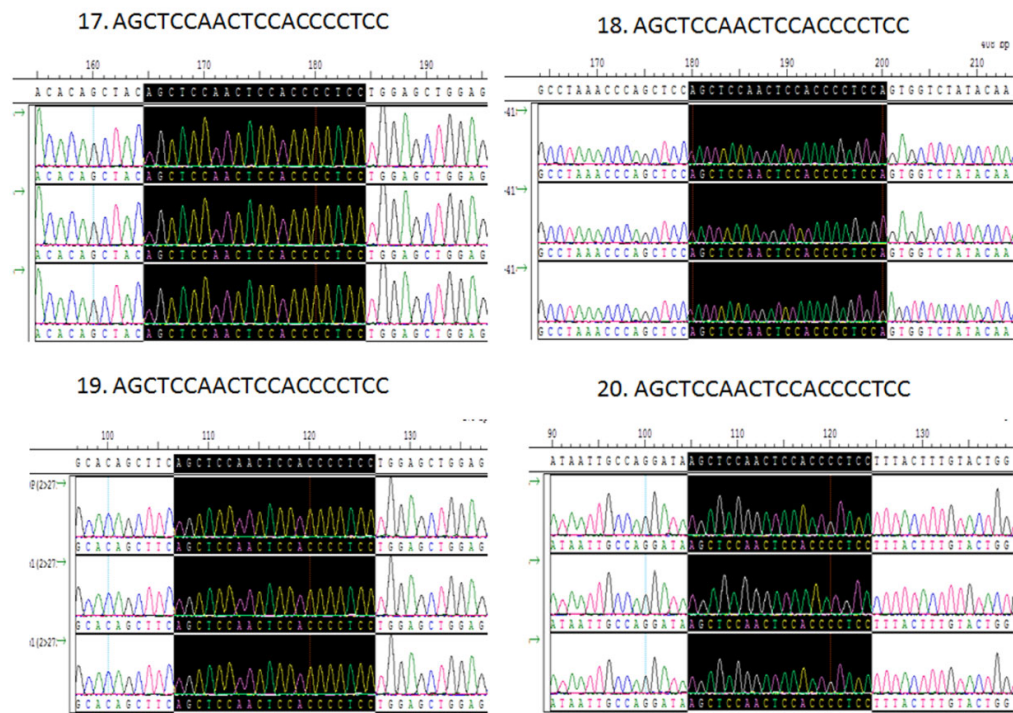

**Figure S7.** Sequence alignments of off-target sites 17, 18, 19, 20 in Cr-12, Cr-18 and Cr-19 respectively.
